# Supplementary material
Source: PubMed Central journal article supplement (PMC8314631)
Supplement: jcsm.9202.ds001.pdf [file jcsm.9202.ds001.pdf]

**Figure S1 - Bland Altman Analysis evaluating accuracy of AHI measure comparing pre-PSG HST to post-PSG HST.**

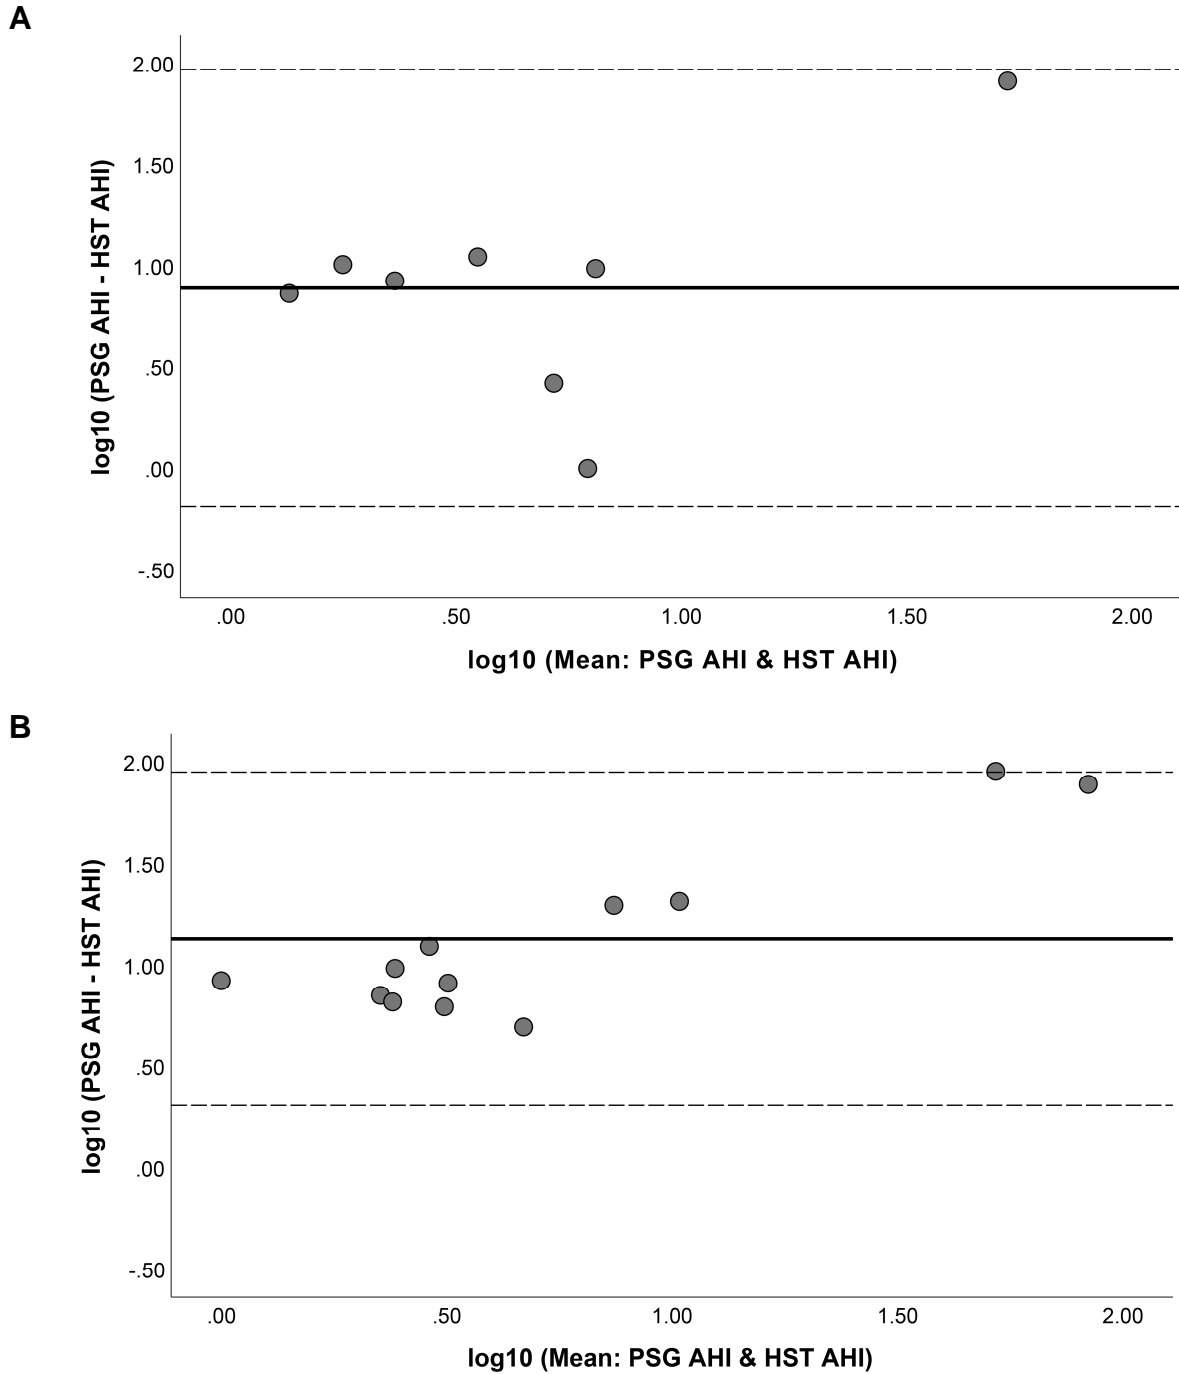

**(A)** Bland Altman Analysis comparing PSG AHI to pre-PSG HST AHI (n=8).

**(B)** Bland Altman Analysis comparing PSG AHI to post-PSG HST AHI (n=12).

**Figure S2 - Bland Altman Analysis evaluating accuracy of ODI measure comparing pre-PSG HST to post-PSG HST.**

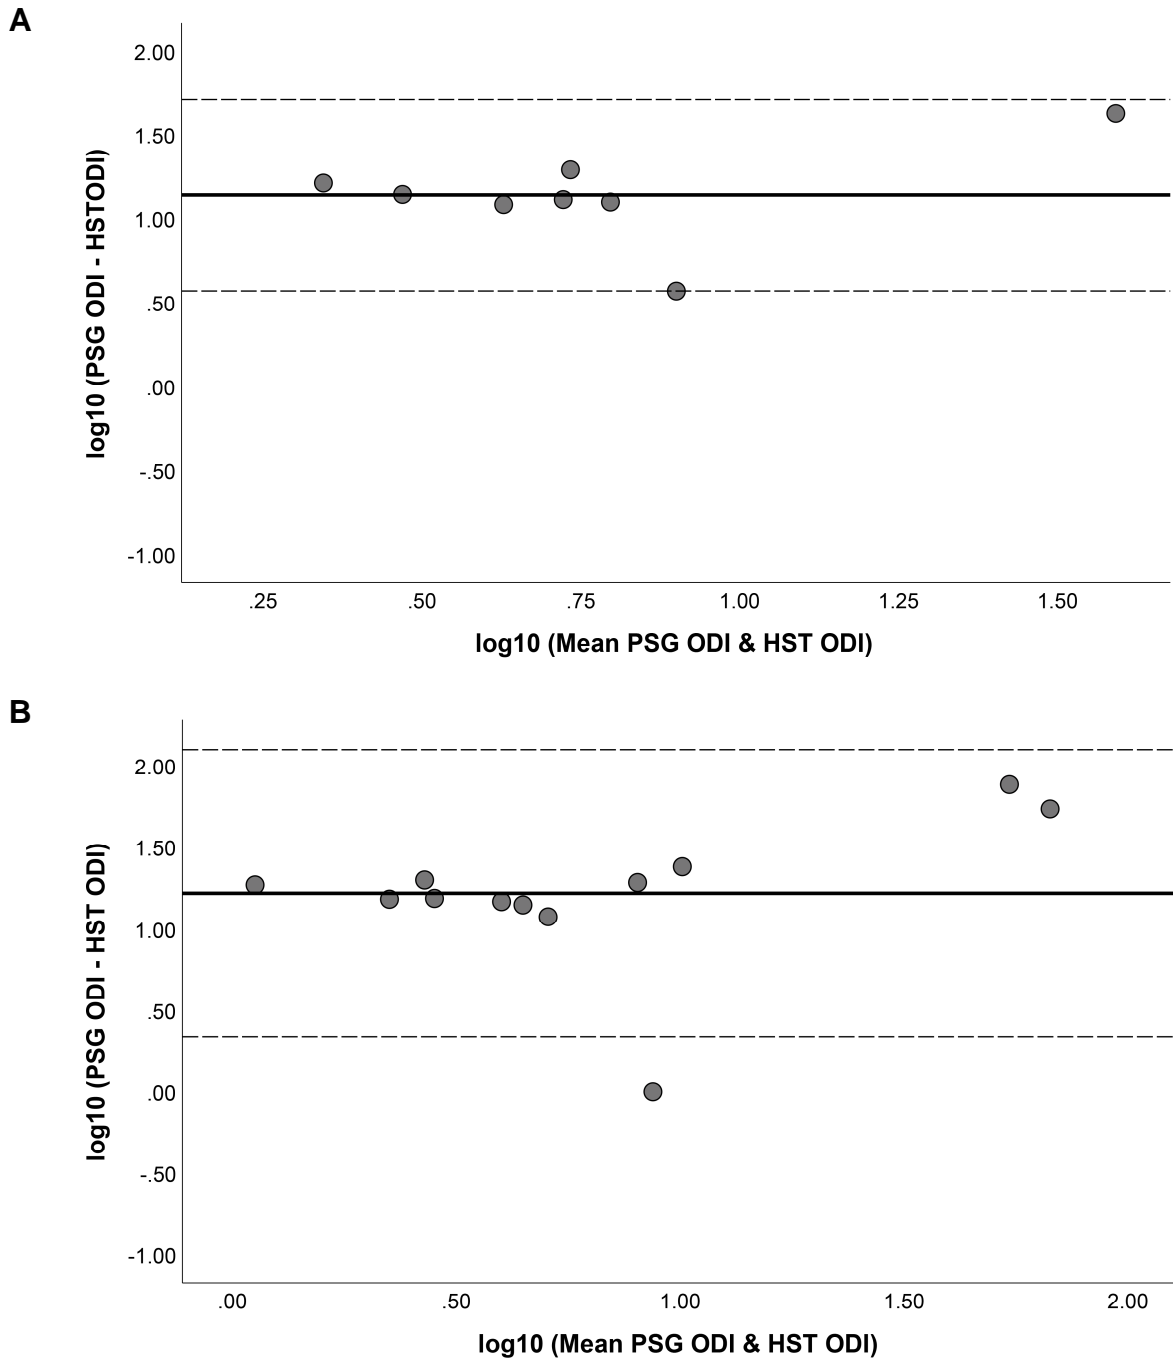

**(A)** Bland Altman Analysis comparing PSG ODI to pre-PSG HST ODI (n=8).  
**(B)** Bland Altman Analysis comparing PSG ODI to post-PSG HST ODI (n=12)
